# Supplementary material
Source: publisher site journal article supplement (https://www.dovepress.com/article/607309)
Supplement: Supplementary file 1 [file 607309_supplementary%20material%204_05_CLEAN.docx]

**SUPPLEMENTARY MATERIALS**

**THE EMOTIONAL ALLODYNIA QUESTIONNAIRE: PRELIMINARY VALIDATION AND CLINICAL PHENOTYPING IN FIBROMYALGIA**

Alberto Corriero¹*****, Mariateresa Giglio¹ , Alfonso Pilolla¹ , Filomena Galdini¹ , Olmina Mucci¹, Miriana Vurro¹, Fara Fornarelli¹, Cinzia Di Venosa¹ , Paolo Trerotoli2, Filomena Puntillo¹

¹ Department of Interdisciplinary Medicine – Pain and ICU Section, University of Bari Aldo Moro, Bari, Italy

2 Department of Interdisciplinary Medicine – Statistics Section, University of Bari Aldo Moro, Bari, Italy

**Table S1**. Item-level reliability statistics for the AEQ

| Item Reliability Statistics | | |
| --- | --- | --- |
|  | | **If item dropped** |
|  | **Item-rest correlation** | **Cronbach's α** |
| **EQ1** | 0.619 | 0.912 |
| **EQ 2** | 0.580 | 0.914 |
| **EQ 3** | 0.531 | 0.916 |
| **EQ 4** | 0.730 | 0.906 |
| **EQ 5** | 0.581 | 0.914 |
| **EQ 6** | 0.694 | 0.908 |
| **EQ 7** | 0.665 | 0.910 |
| **EQ 8** | 0.820 | 0.901 |
| **EQ 9** | 0.749 | 0.905 |
| **EQ 10** | 0.743 | 0.906 |
| **EQ 11** | 0.705 | 0.908 |

**Table S2.** Detailed factor analysis statistics for the AEQ

| KMO Measure of Sampling Adequacy | |
| --- | --- |
|  | **MSA** |
| **Overall** | 0.900 |
| **EQ1** | 0.887 |
| **EQ 2** | 0.900 |
| **EQ 3** | 0.891 |
| **EQ 4** | 0.946 |
| **EQ 5** | 0.886 |
| **EQ 6** | 0.866 |
| **EQ 7** | 0.940 |
| **EQ 8** | 0.883 |
| **EQ 9** | 0.929 |
| **EQ 10** | 0.898 |
| **EQ 11** | 0.875 |

**Table S3. Confirmatory Factor Analysis of the AEQ — Standardized Factor Loadings and Model Fit Indices**

**Table S3A. Model Fit Indices**

| **Model** | **CFI / TLI** | **RMSEA (90% CI)** | **SRMR** |
| --- | --- | --- | --- |
| Baseline (1-factor) | 0.892 / 0.866 | 0.122 (0.095–0.150) | 0.058 |
| Modified (+ EQ10–EQ11 covariance) | 0.924 / 0.903 | 0.104 (0.074–0.133) | 0.055 |

*Note. The residual covariance between EQ10 and EQ11 was freed on theoretical grounds, as both items address emotional responses to delayed digital communication. CFI = Comparative Fit Index; TLI = Tucker-Lewis Index; RMSEA = Root Mean Square Error of Approximation; SRMR = Standardized Root Mean Square Residual.*

**Table S3B. Standardized Factor Loadings (Modified Model)**

| **Item** | **Content (abbreviated)** | **Std. Loading** | **p** |
| --- | --- | --- | --- |
| EQ1 | Discomfort when not receiving a reply | 0.640 | <.001 |
| EQ2 | Interpreting neutral tones as rejection | 0.613 | <.001 |
| EQ3 | Disturbance from vague phrases | 0.534 | <.001 |
| EQ4 | Hurt by perceived exclusion or being ignored | 0.758 | <.001 |
| EQ5 | Marked responses to mild criticism | 0.612 | <.001 |
| EQ6 | Suffering from temporary emotional distance | 0.734 | <.001 |
| EQ7 | Distress from absence of caring gestures | 0.720 | <.001 |
| EQ8 | Feelings of abandonment from lack of reciprocity | 0.867 | <.001 |
| EQ9 | Feeling shaken by non-empathetic responses | 0.779 | <.001 |
| EQ10 | Persistent pain from minor relational situations | 0.772 | <.001 |
| EQ11 | Feeling excluded by delayed replies | 0.734 | <.001 |

*Note. All standardized loadings are statistically significant (p < .001). Higher loadings indicate stronger association with the latent Emotional Allodynia factor.*

**Table S4**. Dwass–Steel–Critchlow–Fligner pairwise comparisons across AEQ–CSI phenotypes

| **Table S4A**. Pairwise comparisons - AEQ_Total | | | |
| --- | --- | --- | --- |
|  |  | **W** | **p** |
| **Resilient** | **Emotional Allodynia** | 8.414 | <.001 |
| **Resilient** | **Central Sensitization** | 0.884 | 0.924 |
| **Resilient** | **Mixed** | 9.843 | <.001 |
| **Emotional Allodynia** | **Central Sensitization** | -7.763 | <.001 |
| **Emotional Allodynia** | **Mixed** | 3.609 | 0.052 |
| **Central Sensitization** | **Mixed** | 8.853 | <.001 |

| **Table S4B.** Pairwise comparisons - CSI_total | | | |
| --- | --- | --- | --- |
|  |  | **W** | **p** |
| **Resilient** | **Emotional Allodynia** | 1.43 | 0.743 |
| **Resilient** | **Central Sensitization** | 8.53 | <.001 |
| **Resilient** | **Mixed** | 9.84 | <.001 |
| **Emotional Allodynia** | **Central Sensitization** | 7.75 | <.001 |
| **Emotional Allodynia** | **Mixed** | 8.71 | <.001 |
| **Central Sensitization** | **Mixed** | 2.44 | 0.311 |

| **Table S4C.** Pairwise comparisons - BDI_total | | | |
| --- | --- | --- | --- |
|  |  | **W** | **p** |
| **Resilient** | **Emotional Allodynia** | 2.778 | 0.202 |
| **Resilient** | **Central Sensitization** | 3.347 | 0.084 |
| **Resilient** | **Mixed** | 6.717 | <.001 |
| **Emotional Allodynia** | **Central Sensitization** | 0.628 | 0.971 |
| **Emotional Allodynia** | **Mixed** | 4.432 | 0.009 |
| **Central Sensitization** | **Mixed** | 3.747 | 0.040 |

| **Table S4D.** Pairwise comparisons - DERS_Total | | | |
| --- | --- | --- | --- |
|  |  | **W** | **p** |
| **Resilient** | **Emotional Allodynia** | 3.88 | 0.031 |
| **Resilient** | **Central Sensitization** | 2.67 | 0.234 |
| **Resilient** | **Mixed** | 7.22 | <.001 |
| **Emotional Allodynia** | **Central Sensitization** | -1.37 | 0.769 |
| **Emotional Allodynia** | **Mixed** | 4.73 | 0.005 |
| **Central Sensitization** | **Mixed** | 5.01 | 0.002 |

| **Table S4E.** Pairwise comparisons - STAI-Y1_Total | | | |
| --- | --- | --- | --- |
|  |  | **W** | **p** |
| **Resilient** | **Emotional Allodynia** | 1.950 | 0.513 |
| **Resilient** | **Central Sensitization** | 2.630 | 0.246 |
| **Resilient** | **Mixed** | 7.354 | <.001 |
| **Emotional Allodynia** | **Central Sensitization** | 0.757 | 0.951 |
| **Emotional Allodynia** | **Mixed** | 6.209 | <.001 |
| **Central Sensitization** | **Mixed** | 4.636 | 0.006 |

| **Table S4F.** Pairwise comparisons - STAI-Y2_Total | | | |
| --- | --- | --- | --- |
|  |  | **W** | **p** |
| **Resilient** | **Emotional Allodynia** | 3.1641 | 0.113 |
| **Resilient** | **Central Sensitization** | 2.5897 | 0.259 |
| **Resilient** | **Mixed** | 7.9214 | <.001 |
| **Emotional Allodynia** | **Central Sensitization** | -0.0370 | 1.000 |
| **Emotional Allodynia** | **Mixed** | 4.9756 | 0.002 |
| **Central Sensitization** | **Mixed** | 4.3917 | 0.010 |

| **Table S4G.** Pairwise comparisons - PCS_total | | | |
| --- | --- | --- | --- |
|  |  | **W** | **p** |
| **Resilient** | **Emotional Allodynia** | 3.083 | 0.129 |
| **Resilient** | **Central Sensitization** | 2.953 | 0.157 |
| **Resilient** | **Mixed** | 7.501 | <.001 |
| **Emotional Allodynia** | **Central Sensitization** | -0.185 | 0.999 |
| **Emotional Allodynia** | **Mixed** | 4.153 | 0.017 |
| **Central Sensitization** | **Mixed** | 4.439 | 0.009 |
